# Supplementary material for: Electrochemical detection of p-ethylguaiacol, a fungi infected fruit volatile using metal oxide nanoparticles
Source: Royal Society of Chemistry journal article supplement (doi:10.1039/c4an00384e), 2014-01-01
Supplement: c4an00384e1.pdf [file c4an00384e1.pdf]

## Supplementary Material

### Electrochemical detection of *p*-ethylguaiacol, a fungi infected fruit volatile using metal oxide nanoparticles

Yi Fang, Yogeswaran Umasankar, Ramaraja P. Ramasamy\*  
*Nano Electrochemistry Laboratory, College of Engineering,  
The University of Georgia, Athens, GA 30602, United States*  
\*Email: [rama@uga.edu](mailto:rama@uga.edu) Tel: 706-542-4101 Fax: 706-542-3804

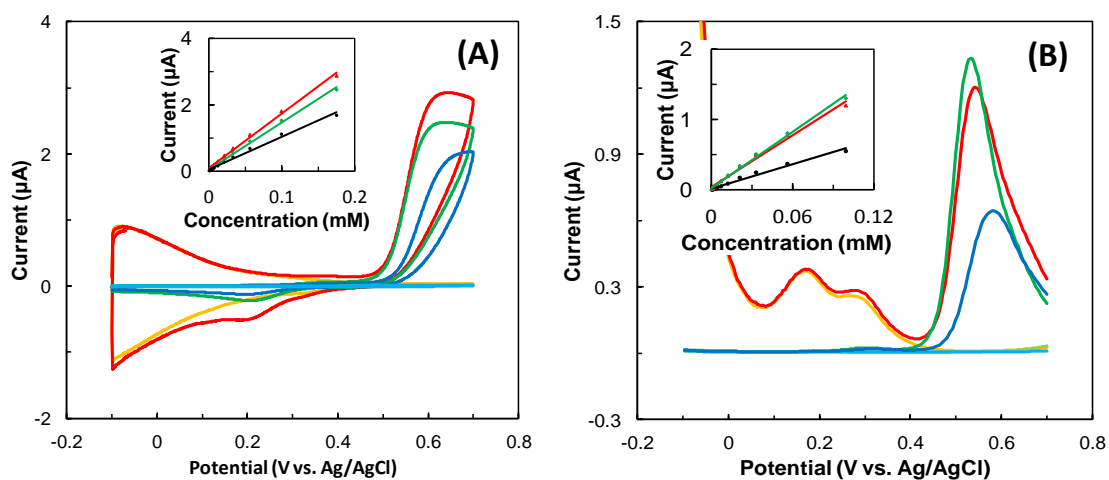

**Fig S1:** CV (A) and DPV (B) response of 0.17 mM and 0.1 mM *p*-ethylguaiacol respectively, at SnO<sub>2</sub> modified (red), TiO<sub>2</sub> modified (green) and unmodified (blue) SP electrodes. The inserts display the concentration effect within the linear range of *p*-ethylguaiacol oxidation at SnO<sub>2</sub> (red), TiO<sub>2</sub> (green) and unmodified SP (blue).

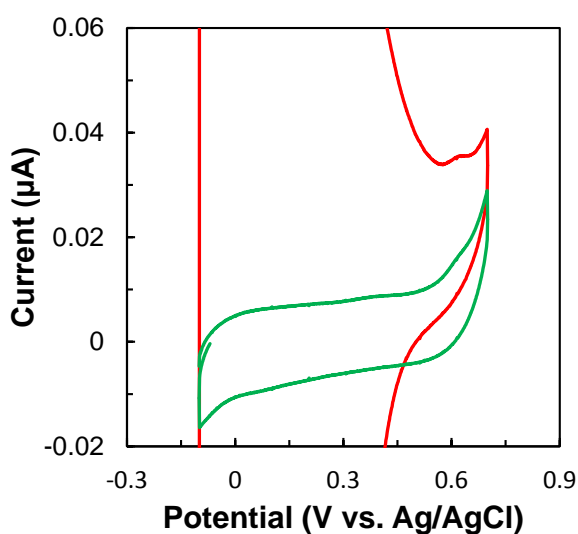

**Fig S2:** CV response of SnO<sub>2</sub> (red) and TiO<sub>2</sub> (green) modified SP electrodes without *p*-ethylguaiacol.

**Table S1:** Reproducibility of *p*-ethylguaiacol (2.5 mM) oxidation at SnO<sub>2</sub>-SP and TiO<sub>2</sub>-SP electrodes.

|             | <b>SnO<sub>2</sub>-SP</b> | <b>TiO<sub>2</sub>-SP</b> |
|-------------|---------------------------|---------------------------|
| Electrode 1 | 7.24                      | 5.66                      |
| Electrode 2 | 7.10                      | 5.39                      |
| Electrode 3 | 6.88                      | 5.68                      |
| Electrode 4 | 7.02                      | 6.01                      |
| Electrode 5 | 7.10                      | 6.22                      |
| Electrode 6 | 7.34                      | 6.16                      |
| Electrode 7 | 7.41                      | 6.13                      |
| Electrode 8 | 7.39                      | 6.14                      |
| Average     | 7.18                      | 5.92                      |
| SD          | 0.18                      | 0.29                      |
| RSD (%)     | 2.48%                     | 4.85%                     |

**Table S2:** Reusability of SnO<sub>2</sub>-SP and TiO<sub>2</sub>-SP electrodes for the determination of 2.5 mM *p*-ethylguaiacol.

| Days | <b>SnO<sub>2</sub>-SP</b> |      |         | <b>TiO<sub>2</sub>-SP</b> |      |         |
|------|---------------------------|------|---------|---------------------------|------|---------|
|      | Current decrease (%)      | SD   | RSD (%) | Current decrease (%)      | SD   | RSD (%) |
| 1    | 100.00                    |      |         | 100.00                    |      |         |
| 2    | 72.40                     | 0.92 | 16.01   | 60.94                     | 1.21 | 24.27   |
| 3    | 53.11                     | 1.29 | 25.60   | 49.52                     | 1.34 | 30.81   |
| 4    | 53.80                     | 1.27 | 27.30   | 33.11                     | 1.53 | 40.48   |
| 5    | 40.04                     | 1.39 | 32.57   | 22.52                     | 1.67 | 50.48   |
| 6    | 32.01                     | 1.50 | 38.24   | 16.60                     | 1.74 | 59.57   |
| 10   | 29.49                     | 1.54 | 42.45   | 17.41                     | 1.74 | 65.28   |
| 15   | 32.19                     | 1.53 | 44.19   | 18.99                     | 1.70 | 68.56   |
